# Supplementary material for: Distribution of antibiotic resistance genes and their pathogen hosts in duck farm environments in south-east coastal China
Source: PubMed Central journal article supplement (PMC10789667; doi:10.1007/s00253-023-12842-4), 2024-01-15
Supplement: 253_2023_12842_MOESM1_ESM.pdf [file 253_2023_12842_MOESM1_ESM.pdf]

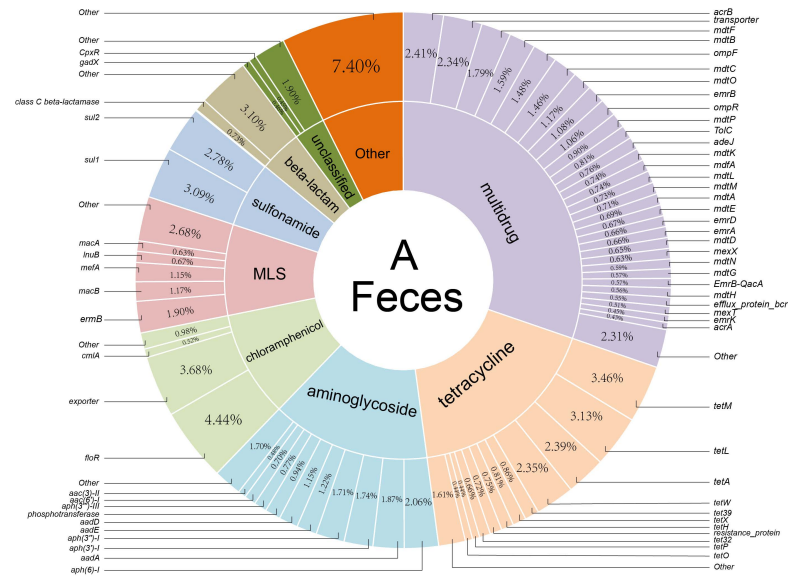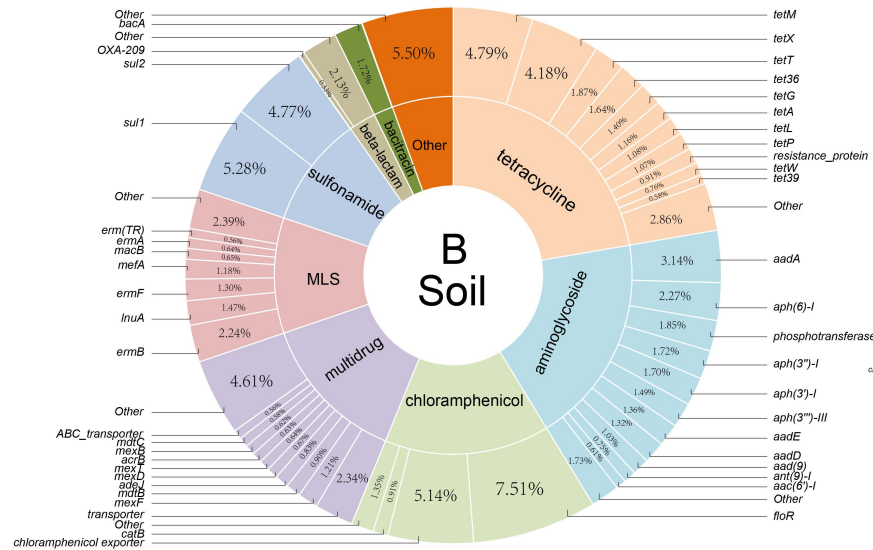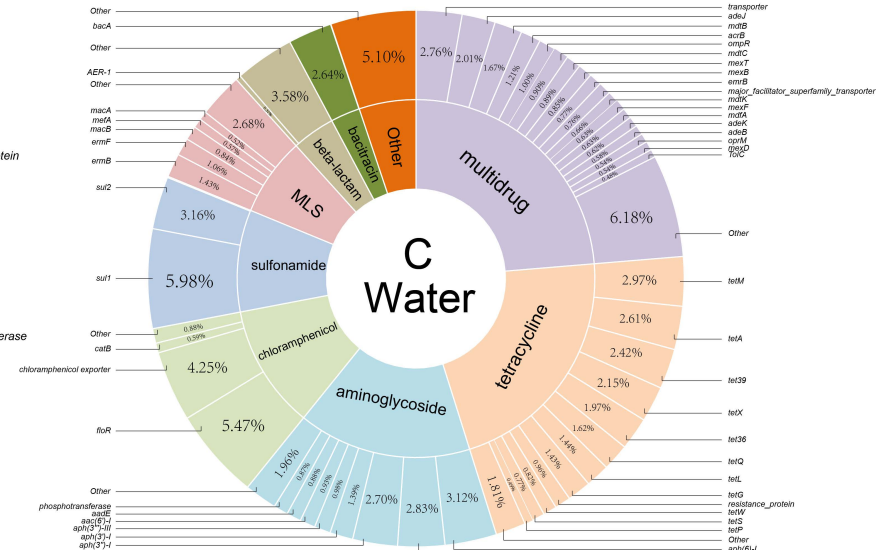

21

22 Fig S1. Doughnut charts showing the details of ARGs composition in (A) the feces samples, (b) the soil samples and (c) the water samples.

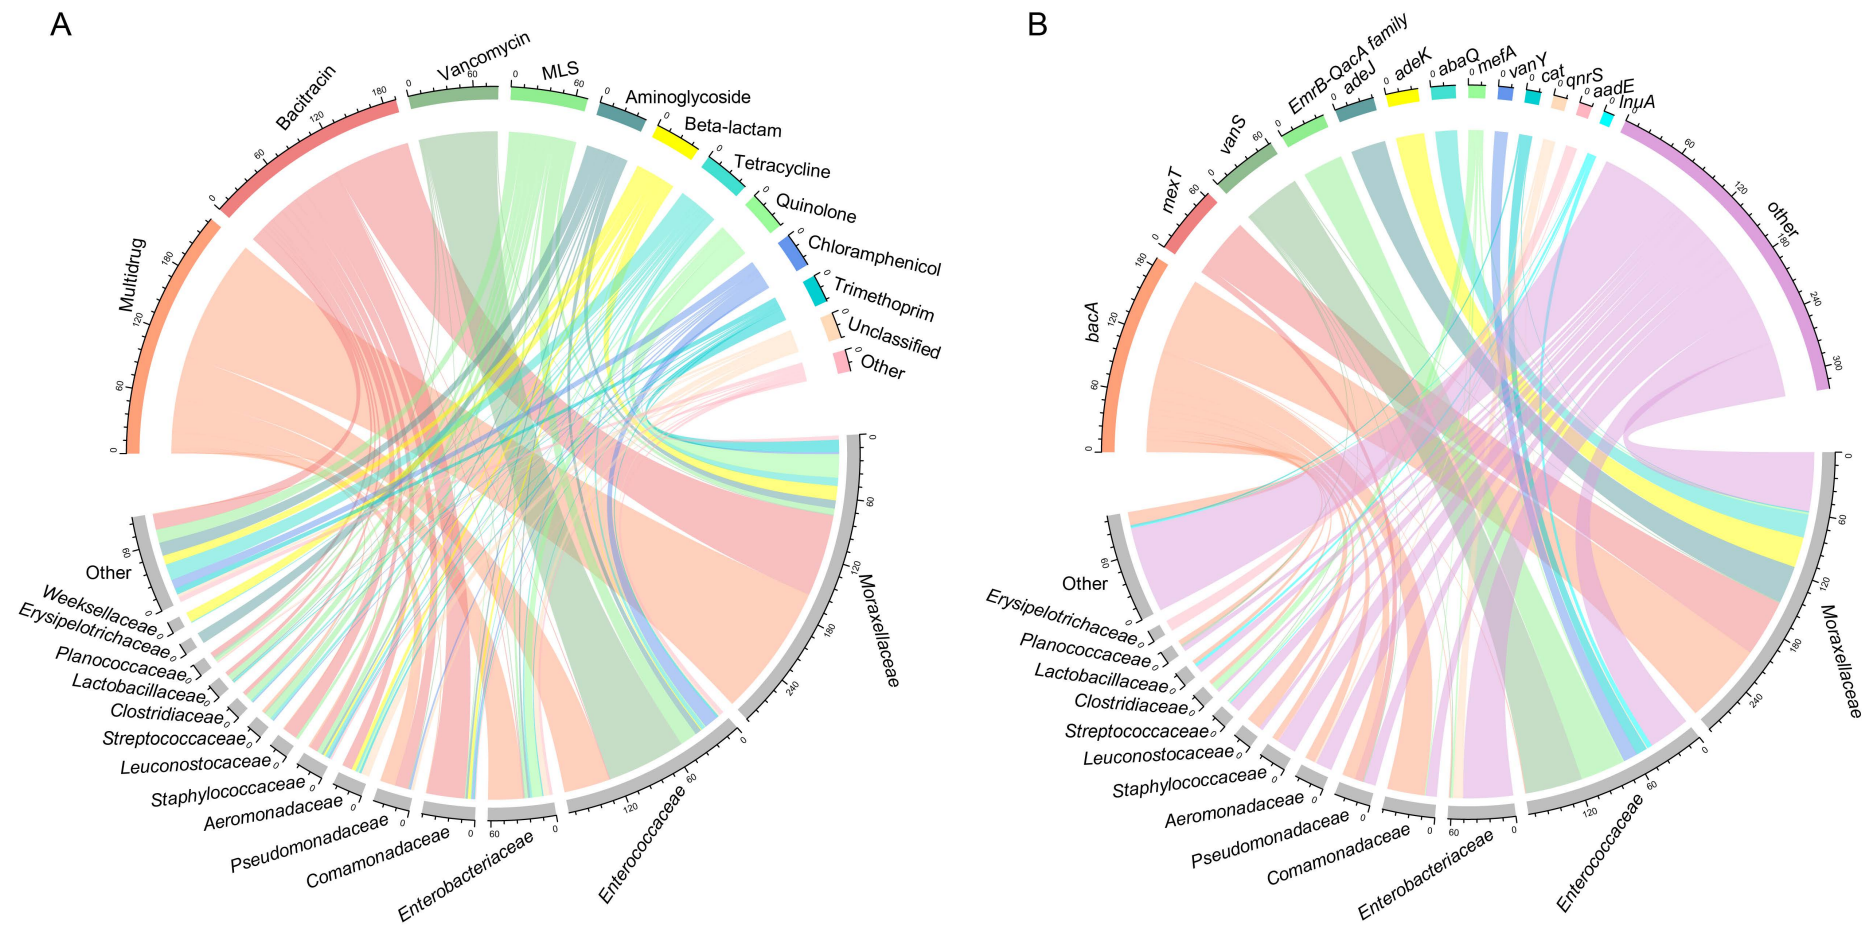

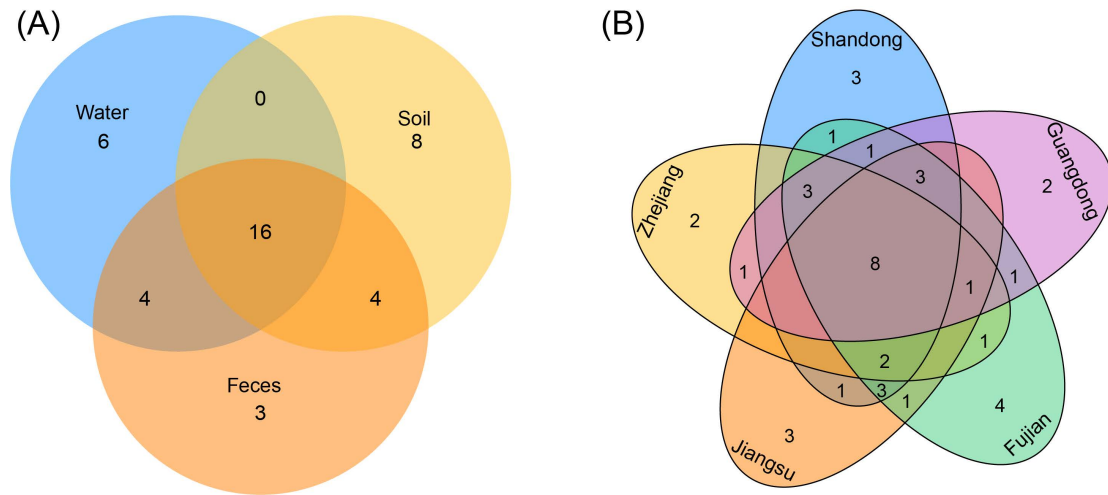

26  
27  
28  
29  
30

**Fig S3.** Venn diagram showing the numbers of shared and unique ARGs subtype. (A) the numbers of shared and unique ARGs subtype among the feces, soil and water. (B) the numbers of shared and unique ARGs subtype among the Shandong, Jiangsu, Zhejiang, Fujian and Guangdong

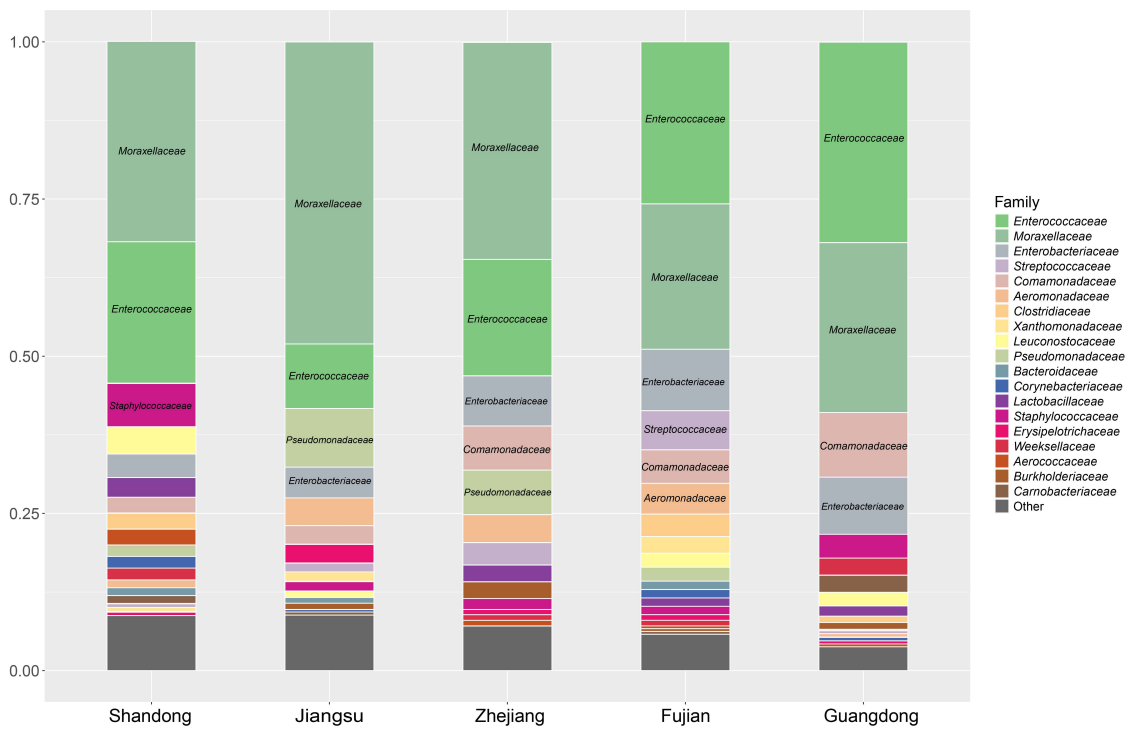

31  
32  
33

**Fig S4.** Composition of ARG bacterial hosts the Shandong, Jiangsu, Zhejiang, Fujian and Guangdong

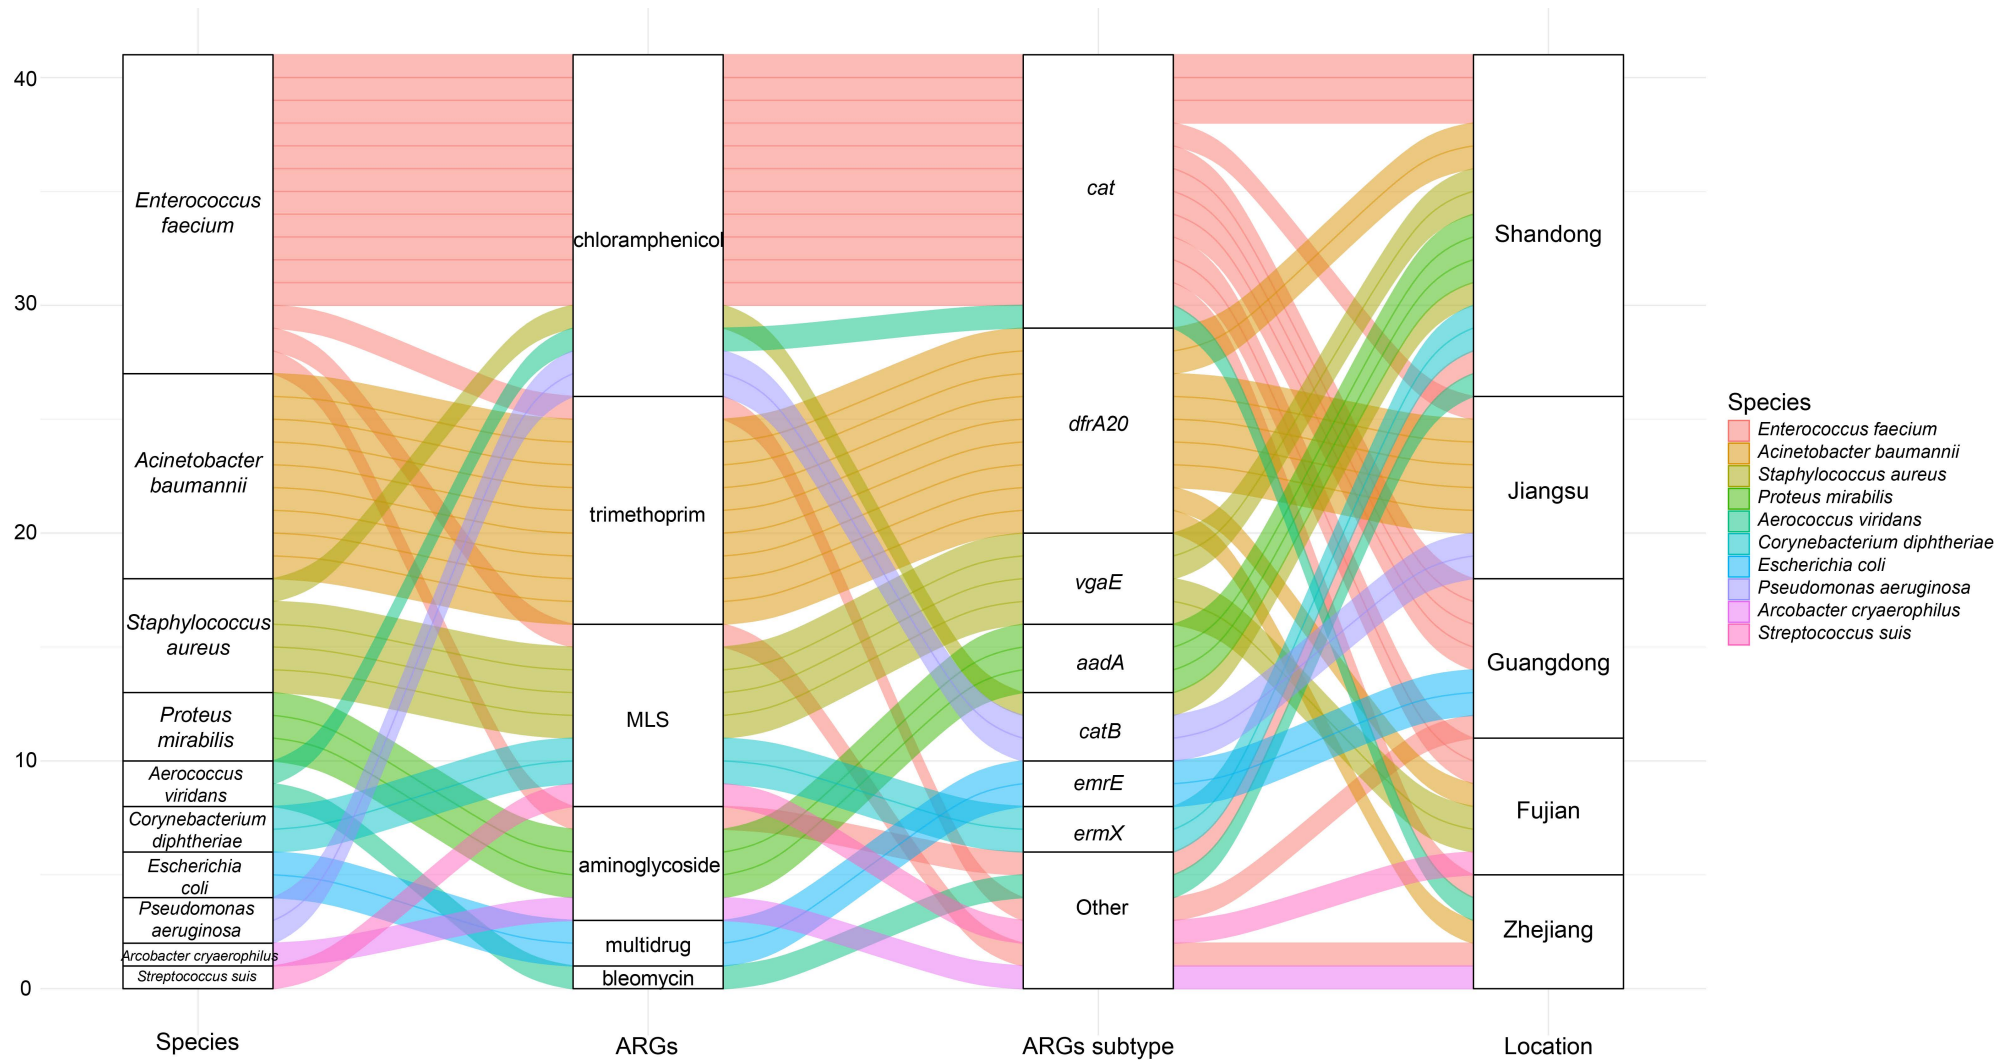

34

35 **Fig S5.** Correlations between human pathogenic bacteria, ARGs, ARGs subtype and location.

36 **Table S1.** The numbers of ARGs subtype in each ARGs type

| Types of ARGs   | Numbers of subtype | Types of ARGs | Numbers of subtype |
|-----------------|--------------------|---------------|--------------------|
| beta-lactam     | 529                | quinolone     | 6                  |
| multidrug       | 82                 | fosfomicin    | 3                  |
| MLS             | 48                 | rifamycin     | 3                  |
| aminoglycoside  | 42                 | sulfonamide   | 2                  |
| tetracycline    | 36                 | bacitracin    | 2                  |
| trimethoprim    | 20                 | bleomycin     | 2                  |
| vancomycin      | 17                 | fosmidomycin  | 2                  |
| unclassified    | 15                 | kasugamycin   | 1                  |
| chloramphenicol | 13                 | polymyxin     | 1                  |

37

38

39 **Table S2.** The average relative abundance of ARG subtypes in feces, soil and water, respectively

| ARG Subtypes             | Feces (ppm) | Soil (ppm) | Water (ppm) | Total (ppm) |
|--------------------------|-------------|------------|-------------|-------------|
| <i>floR</i>              | 289 ± 335   | 91 ± 91    | 66 ± 70     | 159 ± 238   |
| chloramphenicol exporter | 239 ± 194   | 63 ± 69    | 51 ± 54     | 126 ± 156   |
| <i>sul1</i>              | 201 ± 176   | 64 ± 64    | 72 ± 80     | 118 ± 138   |
| <i>tetM</i>              | 225 ± 114   | 58 ± 114   | 36 ± 54     | 115 ± 133   |
| <i>sul2</i>              | 181 ± 111   | 58 ± 66    | 38 ± 45     | 99 ± 104    |
| <i>tetL</i>              | 204 ± 165   | 13 ± 20    | 17 ± 43     | 86 ± 139    |
| multidrug transporter    | 152 ± 85    | 29 ± 20    | 33 ± 33     | 76 ± 81     |
| <i>tetA</i>              | 156 ± 115   | 14 ± 13    | 31 ± 71     | 72 ± 104    |
| <i>aph(6)</i> -I         | 134 ± 104   | 28 ± 40    | 38 ± 58     | 71 ± 90     |
| <i>aadA</i>              | 122 ± 71    | 38 ± 38    | 34 ± 37     | 69 ± 67     |
| <i>acrB</i>              | 157 ± 123   | 8 ± 4      | 15 ± 24     | 66 ± 104    |
| <i>tetW</i>              | 153 ± 152   | 9 ± 15     | 10 ± 11     | 64 ± 117    |
| <i>ermB</i>              | 124 ± 146   | 27 ± 74    | 17 ± 54     | 61 ± 115    |
| <i>aph(3'')</i> -I       | 116 ± 87    | 21 ± 28    | 33 ± 51     | 60 ± 76     |
| <i>aph(3')</i> -I        | 113 ± 110   | 21 ± 34    | 17 ± 24     | 55 ± 85     |
| Other                    | 1944 ± 616  | 447 ± 496  | 409 ± 338   | 2294 ± 2003 |

40 **Table S3.** The average relative abundance of ARG subtypes in Shandong, Jiangsu, Zhejiang, Fujian and Guangdong, respectively

| Subtypes of ARGs         | Shandong (ppm) | Jiangsu (ppm) | Zhejiang (ppm) | Fujian (ppm) | Guangdong (ppm) | Total (ppm) |
|--------------------------|----------------|---------------|----------------|--------------|-----------------|-------------|
| <i>floR</i>              | 229 ± 148      | 168 ± 125     | 186 ± 423      | 130 ± 81     | 119 ± 171       | 159 ± 238   |
| chloramphenicol exporter | 159 ± 72       | 106 ± 71      | 130 ± 242      | 157 ± 146    | 95 ± 127        | 126 ± 156   |
| <i>sul1</i>              | 206 ± 148      | 123 ± 89      | 108 ± 202      | 101 ± 62     | 101 ± 127       | 118 ± 138   |
| <i>tetM</i>              | 244 ± 117      | 66 ± 61       | 99 ± 128       | 148 ± 170    | 84 ± 101        | 115 ± 133   |
| <i>sul2</i>              | 219 ± 128      | 138 ± 116     | 55 ± 68        | 69 ± 44      | 82 ± 101        | 99 ± 104    |
| <i>tetL</i>              | 48 ± 24        | 48 ± 65       | 80 ± 121       | 146 ± 199    | 86 ± 145        | 86 ± 139    |
| multidrug transporter    | 51 ± 35        | 113 ± 100     | 41 ± 34        | 79 ± 62      | 89 ± 106        | 76 ± 81     |
| <i>tetA</i>              | 73 ± 65        | 90 ± 107      | 23 ± 32        | 67 ± 60      | 112 ± 159       | 72 ± 104    |
| <i>aph(6)</i> -I         | 203 ± 130      | 87 ± 71       | 39 ± 53        | 40 ± 31      | 57 ± 93         | 71 ± 90     |
| <i>aadA</i>              | 140 ± 72       | 84 ± 67       | 31 ± 38        | 59 ± 33      | 69 ± 81         | 69 ± 67     |
| <i>acrB</i>              | 37 ± 37        | 108 ± 144     | 25 ± 34        | 58 ± 66      | 89 ± 135        | 66 ± 104    |
| <i>tetW</i>              | 25 ± 20        | 33 ± 58       | 65 ± 111       | 113 ± 175    | 60 ± 101        | 64 ± 117    |
| <i>ermB</i>              | 99 ± 104       | 20 ± 20       | 67 ± 131       | 108 ± 169    | 30 ± 43         | 61 ± 115    |
| <i>aph(3'')</i> -I       | 162 ± 102      | 70 ± 57       | 35 ± 48        | 35 ± 27      | 54 ± 90         | 60 ± 76     |
| <i>aph(3')</i> -I        | 170 ± 111      | 78 ± 94       | 23 ± 35        | 20 ± 14      | 47 ± 86         | 55 ± 85     |
| Other                    | 1508 ± 370     | 1129 ± 914    | 589 ± 566      | 1138 ± 956   | 940 ± 1049      | 2294 ± 2003 |

42 **Table S4.** The top 6 most abundant ARGs of each sample in feces, soil and water, respectively

| Origin | Multidrug<br>(ppm) | Tetracycline<br>(ppm) | Aminoglycoside<br>(ppm) | Chloramphenicol<br>(ppm) | MLS<br>(ppm) | Sulfonamide<br>(ppm) |
|--------|--------------------|-----------------------|-------------------------|--------------------------|--------------|----------------------|
| Feces  | 1969 ± 1398        | 1147 ± 406            | 934 ± 471               | 462 ± 299                | 535 ± 238    | 386 ± 261            |
| Soil   | 165 ± 113          | 271 ± 313             | 231 ± 359               | 392 ± 564                | 127 ± 223    | 123 ± 128            |
| Water  | 285 ± 292          | 258 ± 264             | 188 ± 218               | 103 ± 138                | 85 ± 135     | 111 ± 123            |

43



44 **Table S5.** The top 6 most abundant ARGs of each sample in Shandong, Jiangsu, Zhejiang, Fujian and Guangdong, respectively

| Location  | Multidrug<br>(ppm) | Tetracycline<br>(ppm) | Aminoglycoside<br>(ppm) | Chloramphenicol<br>(ppm) | MLS<br>(ppm) | Sulfonamide<br>(ppm) |
|-----------|--------------------|-----------------------|-------------------------|--------------------------|--------------|----------------------|
| Shandong  | 534 ± 525          | 869 ± 233             | 1360 ± 380              | 468 ± 215                | 469 ± 210    | 426 ± 267            |
| Jiangsu   | 1364 ± 1572        | 500 ± 307             | 475 ± 421               | 321 ± 214                | 210 ± 169    | 262 ± 200            |
| Zhejiang  | 365 ± 389          | 429 ± 504             | 269 ± 337               | 347 ± 690                | 243 ± 319    | 164 ± 261            |
| Fujian    | 781 ± 737          | 804 ± 728             | 452 ± 451               | 346 ± 225                | 344 ± 388    | 172 ± 99             |
| Guangdong | 1207 ± 1652        | 537 ± 545             | 346 ± 440               | 269 ± 355                | 186 ± 215    | 185 ± 230            |

45 **Table S6.** The abundance of different phyla in ARG-carrying contigs among the feces, soil and  
 46 water, respectively

| Phyla                 | Feces           | Soil           | Water          | Total            |
|-----------------------|-----------------|----------------|----------------|------------------|
| <i>Proteobacteria</i> | 522/1119, 46.6% | 227/451, 50.3% | 439/635, 69.1% | 1188/2205, 53.9% |
| <i>Firmicutes</i>     | 506/1119, 45.2% | 131/451, 29.0% | 119/635, 18.7% | 756/2205, 34.3%  |
| <i>Bacteroidetes</i>  | 60/1119, 5.4%   | 42/451, 9.3%   | 34/635, 5.4%   | 136/2205, 6.2%   |
| <i>Actinobacteria</i> | 30/1119, 2.7%   | 49/451, 10.9%  | 39/635, 6.1%   | 118/2205, 5.4%   |
| Other                 | 1/1119, 0.1%    | 2/451, 0.4%    | 4/635, 0.6%    | 7/2205, 0.3%     |

47

48

49 **Table S7.** Taxonomic assignments of the 847 ARG-carrying contigs at the family level

| Family                     | Contig numbers | Rates |
|----------------------------|----------------|-------|
| <i>Moraxellaceae</i>       | 288            | 34.0% |
| <i>Enterococcaceae</i>     | 174            | 20.5% |
| <i>Enterobacteriaceae</i>  | 63             | 7.4%  |
| <i>Comamonadaceae</i>      | 49             | 5.8%  |
| <i>Pseudomonadaceae</i>    | 34             | 4.0%  |
| <i>Aeromonadaceae</i>      | 28             | 3.3%  |
| <i>Staphylococcaceae</i>   | 26             | 3.1%  |
| <i>Leuconostocaceae</i>    | 18             | 2.1%  |
| <i>Streptococcaceae</i>    | 15             | 1.8%  |
| <i>Clostridiaceae</i>      | 14             | 1.7%  |
| <i>Lactobacillaceae</i>    | 14             | 1.7%  |
| <i>Planococcaceae</i>      | 12             | 1.4%  |
| <i>Erysipelotrichaceae</i> | 11             | 1.3%  |
| <i>Weeksellaceae</i>       | 11             | 1.3%  |
| <i>Carnobacteriaceae</i>   | 9              | 1.1%  |
| <i>Burkholderiaceae</i>    | 8              | 0.9%  |
| <i>Corynebacteriaceae</i>  | 8              | 0.9%  |
| <i>Aerococcaceae</i>       | 7              | 0.8%  |
| <i>Bacteroidaceae</i>      | 6              | 0.7%  |
| <i>Flavobacteriaceae</i>   | 6              | 0.7%  |
| <i>Lachnospiraceae</i>     | 5              | 0.6%  |
| Other                      | 41             | 4.8%  |

50

51 **Table S8.** Taxonomic assignments of the 212 ARG-carrying contigs at the species level

| Species                                   | Contig numbers | Rate  |
|-------------------------------------------|----------------|-------|
| <i>Enterococcus cecorum</i>               | 74             | 34.9% |
| <i>Enterococcus faecium</i>               | 14             | 6.6%  |
| <i>Erysipelotrichaceae bacterium MTC7</i> | 11             | 5.2%  |
| <i>Acinetobacter baumannii</i>            | 9              | 4.2%  |
| <i>Acinetobacter calcoaceticus</i>        | 9              | 4.2%  |
| <i>Enterococcus columbae</i>              | 6              | 2.8%  |
| <i>Anaerobium acetethylicum*</i>          | 5              | 2.4%  |
| <i>Escherichia fergusonii</i>             | 5              | 2.4%  |
| <i>Staphylococcus aureus</i>              | 5              | 2.4%  |
| <i>Enterococcus diestrammenae</i>         | 4              | 1.9%  |
| <i>Lactobacillus agilis</i>               | 4              | 1.9%  |
| <i>Weissella paramesenteroides</i>        | 4              | 1.9%  |
| <i>Bordetella trematum</i>                | 3              | 1.4%  |
| <i>Enterococcus aquimarinus</i>           | 3              | 1.4%  |
| <i>Proteus mirabilis</i>                  | 3              | 1.4%  |
| Other                                     | 53             | 25.0% |

53 **Table S9.** The abundance of human Pathogenic bacteria in feces, soil and water,  
 54 respectively

| Pathogenic bacteria                | Feces | Soil | Water | Total |
|------------------------------------|-------|------|-------|-------|
| <i>Enterococcus faecium</i>        | 13    | 1    | 0     | 14    |
| <i>Acinetobacter baumannii</i>     | 5     | 2    | 2     | 9     |
| <i>Staphylococcus aureus</i>       | 3     | 2    | 0     | 5     |
| <i>Proteus mirabilis</i>           | 2     | 1    | 0     | 3     |
| <i>Aerococcus viridans</i>         | 0     | 1    | 1     | 2     |
| <i>Corynebacterium diphtheriae</i> | 0     | 2    | 0     | 2     |
| <i>Escherichia coli</i>            | 1     | 1    | 0     | 2     |
| <i>Pseudomonas aeruginosa</i>      | 0     | 2    | 0     | 2     |
| <i>Arcobacter cryaerophilus</i>    | 0     | 0    | 1     | 1     |
| <i>Streptococcus suis</i>          | 0     | 0    | 1     | 1     |
| Total                              | 24    | 12   | 5     | 41    |

55
